# Supplementary material
Source: MDPI journal article supplement (https://www.mdpi.com/2071-1050/16/6/2441)
Supplement: s1 [file s1]

# Assessing Environmental Sustainability of Phytoremediation to Remove Copper from Contaminated Soils

Juan J. Espada <sup>1,\*</sup>, Rosalía Rodríguez <sup>1</sup>, Andrea Delgado <sup>1</sup>, Gemma Vicente <sup>1,2</sup>  
and Luis Fernando Bautista <sup>2,3</sup>

- <sup>1</sup> Department of Chemical, Energy and Mechanical Technology, ESCET, Universidad Rey Juan Carlos, 28933 Móstoles, Madrid, Spain; rosalia.rodriguez@urjc.es (R.R.); a.delgadon.2016@alumnos.urjc.es (A.D.); gemma.vicente@urjc.es (G.V.)  
<sup>2</sup> Instituto de Investigación de Tecnologías para la Sostenibilidad, Universidad Rey Juan Carlos, 28933 Móstoles, Madrid, Spain; fernando.bautista@urjc.es.  
<sup>3</sup> Department of Chemical and Environmental Technology, ESCET, Universidad Rey Juan Carlos, 28933 Móstoles, Madrid, Spain  
\* Correspondence: juanjose.espada@urjc.es; Tel.: +34-91-488-80-87

Table S1: Inventory data of Case 1 referred to the FU (1 ha of treated soil).

| Item                                     | <i>Brassica juncea</i> | <i>Medicago sativa</i> | Rotatory crop |
|------------------------------------------|------------------------|------------------------|---------------|
| <b><i>Cultivation and harvesting</i></b> |                        |                        |               |
| Area (hm <sup>2</sup> )                  | 2                      | 1                      | 4             |
| Seeds (kg)                               | 20                     | 40                     | 80            |
| Sowing (hm <sup>2</sup> )                | 2                      | 1                      | 4             |
| Tillage (hm <sup>2</sup> )               | 2                      | 1                      | 4             |
| Harvesting (hm <sup>2</sup> )            | 2                      | 1                      | 4             |
| Haying (hm <sup>2</sup> )                | 2                      | 1                      | 4             |
| Ammonium nitrate (kg)                    | -                      | 238                    | -             |
| Triple superphosphate (kg)               | 300                    | 149.4                  | 400.8         |
| Potassium chloride (kg)                  | 200                    | 151.3                  | 302.2         |
| Urea (kg)                                | 400                    | -                      | 335.4         |
| Borax (kg)                               | -                      | 7.76                   | 5.24          |
| Compost (kg)                             | 1507                   | -                      | 1507          |
| Manure (kg)                              | -                      | 650                    | 1500          |
| EDTA (kg)                                | 5611.1                 | -                      | 5611.1        |
| Irrigation drip (m <sup>3</sup> )        | -                      | 1784.8                 | 2793.5        |
| <b><i>Conditioning and transport</i></b> |                        |                        |               |
| Produced biomass (DM)* (kg)              | 11208                  | 19400                  | 24304         |
| Electricity (kWh)                        | 31.2                   | 25                     | 82.4          |
| Diesel for transport (kg)                | 46                     | 74.48                  | 101.0         |
| <b><i>Biomass use</i></b>                |                        |                        |               |

|                                        |                                               |                                               |         |
|----------------------------------------|-----------------------------------------------|-----------------------------------------------|---------|
| <i>a) Landfill deposition</i>          |                                               |                                               |         |
| Contaminated biomass (kg)              | 11208                                         | 19400                                         | 24304   |
| <i>b) Cogeneration</i>                 |                                               |                                               |         |
| Biomass formula                        | C <sub>7</sub> H <sub>12</sub> O <sub>6</sub> | C <sub>8</sub> H <sub>13</sub> O <sub>6</sub> | -       |
| Compressed air (Nm <sup>3</sup> )      | 37360.0                                       | 68240.0                                       | 87840.0 |
| Heat (kWh)                             | 19056.0                                       | 33460.0                                       | 43820.0 |
| Electricity (kWh)                      | 13339.2                                       | 23422.0                                       | 30674.0 |
| CO <sub>2</sub> emissions (kg)         | 12683.4                                       | 22633.8                                       | 29436.8 |
| Ash (kg)                               | 11.6                                          | 19.7                                          | 36.2    |
| Diesel transport for ash disposal (kg) | 0.043                                         | 0.074                                         | 0.136   |

\*DM: Dry mass

Table S2: Inventory data of Case 2 referred to the FU (1 ha of decontaminated soil).

| Item                                        | Value  |
|---------------------------------------------|--------|
| <b><i>Excavation and soil transport</i></b> |        |
| Excavator (m <sup>3</sup> )                 | 2000   |
| Mini skid steer (m <sup>3</sup> )           | 2000   |
| Diesel for transport (kg)                   | 11968  |
| <b><i>Pretreatment and washing</i></b>      |        |
| Hopper (kWh)                                | 1500   |
| Vibrating screen (kWh)                      | 18370  |
| Centrifugation (kWh)                        | 367    |
| Hydrocyclone (kWh)                          | 2376   |
| Hydrochloric acid (20 wt% solution) (kg)    | 5899   |
| Washing tank (0.2 N HCl solution) (kWh)     | 1670   |
| Centrifugation (kWh)                        | 559    |
| <b><i>Wastewater treatment</i></b>          |        |
| Sodium hydroxide (kg)                       | 1294   |
| Neutralization tank (0.2 N NaOH) (kWh)      | 2358   |
| Thickening (kWh)                            | 135    |
| Clarification (kWh)                         | 232    |
| Centrifugation (kWh)                        | 182    |
| <b><i>Landfill deposition</i></b>           |        |
| Disposal, hazardous waste (ton)             | 880    |
| Diesel for transport (kg)                   | 4899.4 |
| <b><i>Soil refilling</i></b>                |        |
| Raw sand (kg)                               | 880    |

|                                   |        |
|-----------------------------------|--------|
| Diesel for transport (kg)         | 8452.4 |
| Mini skid steer (m <sup>3</sup> ) | 2000   |

Table S3: Inventory data for Case study 3 referred to the FU (1 ha of decontaminated soil).

| Item                                                   | Value |
|--------------------------------------------------------|-------|
| <b><i>Excavation</i></b>                               |       |
| Excavator (m <sup>3</sup> )                            | 2000  |
| Mini skid steer (m <sup>3</sup> )                      | 2000  |
| <b><i>Soil disposal</i></b>                            |       |
| Diesel for transport (kg)                              | 11968 |
| Disposal, hazardous waste to underground deposit (ton) | 3200  |
| <b><i>Soil filling</i></b>                             |       |
| Raw sand (kg)                                          | 3200  |
| Diesel for transport (kg)                              | 11968 |
| Excavator (m <sup>3</sup> )                            | 2000  |
| Mini skid steer (m <sup>3</sup> )                      | 2000  |
